# Supplementary material
Source: PubMed Central journal article supplement (PMC3357087)
Supplement: NIHMS373087-supplement-supplement_1.pdf [file NIHMS373087-supplement-supplement_1.pdf]

## Supporting Information

### The Importance of Stereochemically Active Lone Pairs For Influencing Pb(II) and As(III) Protein Binding

Giuseppe Zampella\*<sup>[a]</sup>, Kosh P. Neupane<sup>[b]</sup>, Luca De Gioia<sup>[a]</sup> and Vincent L. Pecoraro\*<sup>[b]</sup>

<sup>[a]</sup>*Department of Biotechnology and Biosciences, Università degli Studi di Milano-Bicocca, Piazza della Scienza 2, 20126, Milan, Italy*

<sup>[b]</sup>*Department of Chemistry, University of Michigan, Ann Arbor, MI 48109, USA*

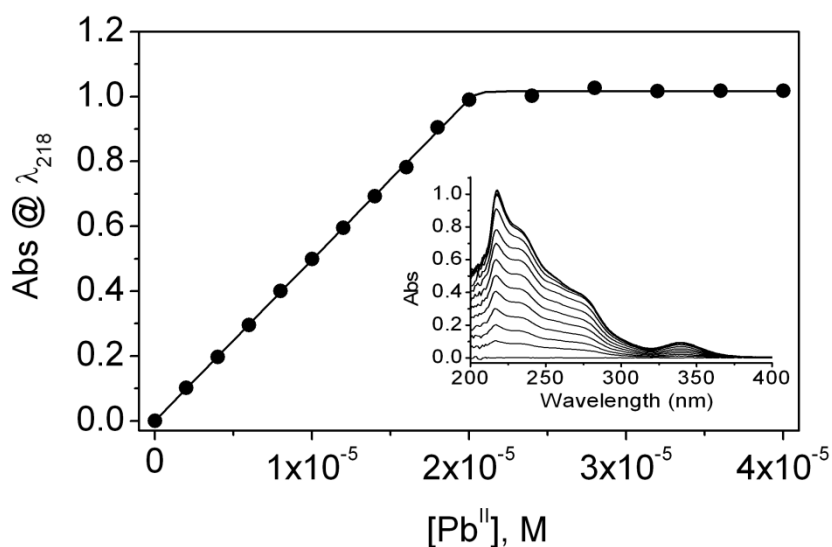

Figure S1. UV/Vis titration of Pb(NO<sub>3</sub>)<sub>2</sub> into TRIL12AL16C (60 μM, 100 mM TrisHCl buffer, pH 8.0). The spectral change at 218 nm was plotted as a function of Pb(NO<sub>3</sub>)<sub>2</sub> concentration and the plot showed that 1 equivalent of Pb(II) bind per peptide trimer. The solid line represents a nonlinear, least square fitting curve generated using 1:1 binding model by ORIGIN with  $K_a = 5.6(\pm 1) \times 10^8 \text{ M}^{-1}$ . The inset depicts the UV/Vis spectral change from each addition of 0.1 equivalent of Pb(II).

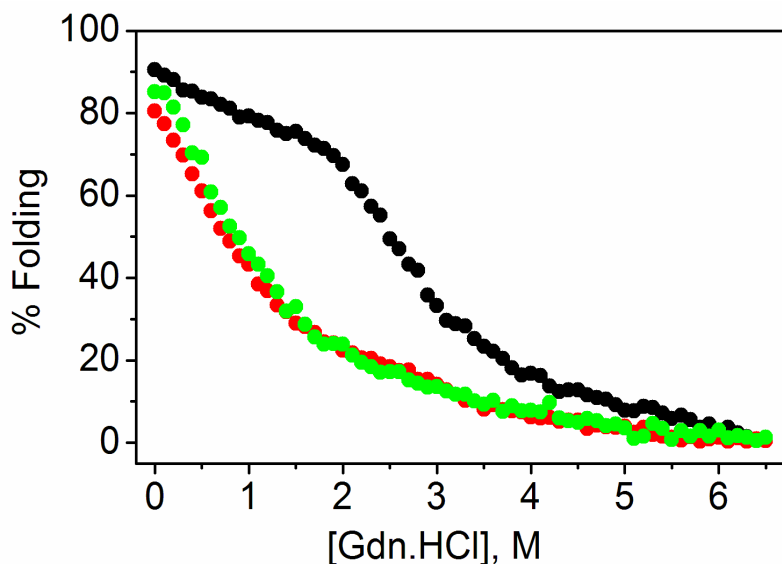

Figure S2. Guanidinium hydrochloride (Gdn.HCl) denaturation curves showing the stability of apo-peptide: **TRIL2WL16C** (black), **TRIL12AL16C** (red), and **TRIL2WL12AL16C** (green). The data were collected at 10  $\mu$ M peptide monomer in TrisHCl buffer at pH 8.0.  $[\theta]_{222}$  is converted into % folded and plotted against Gdn.HCl concentration.

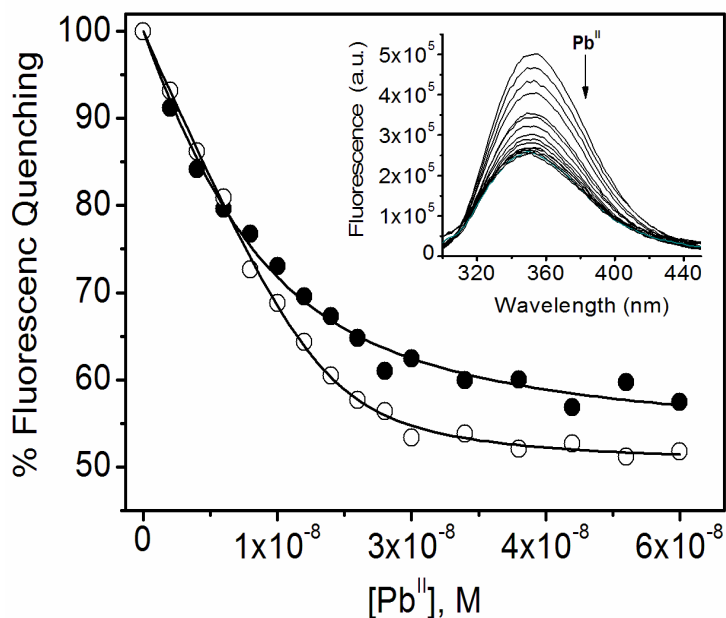

Figure S3. Change in fluorescence intensity upon binding of Pb(II) to the peptide **TRIL2WL16C** (filled circle) and **TRIL2WL12AL16C** (open circle) (30 nM trimer). The Trp was excited at 280 nm and the fluorescence quenching was traced at 354 nm. The curves represent the best fit to Equation 1 by non linear least squares analysis using ORIGIN software. In inset fluorescence quenching spectra were shown for the addition of Pb(II) to **TRIL2WL12AL16C**.

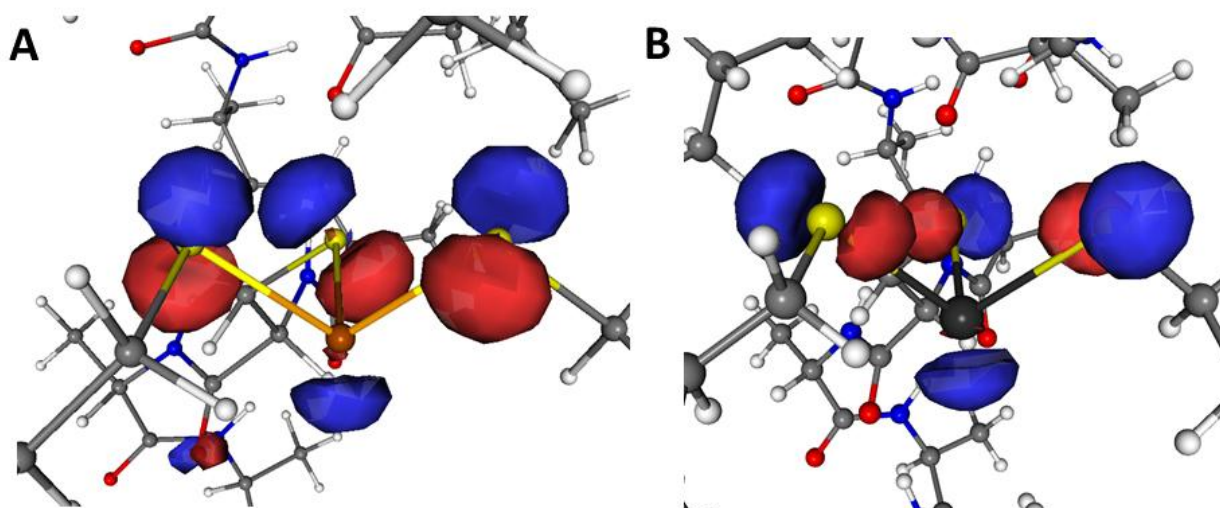

Figure S4. Mapping of isoenergy surfaces associated with the appropriate s and p orbitals for A)  $\text{As(ACA)}_3$  and B)  $\text{Pb(ACA)}_3$ . The eigenvalue of the displayed orbital is  $-0.205285$  Hartree for the As system, while in the case of the Pb system the associated eigenvalue is  $-0.09665$  Hartree.

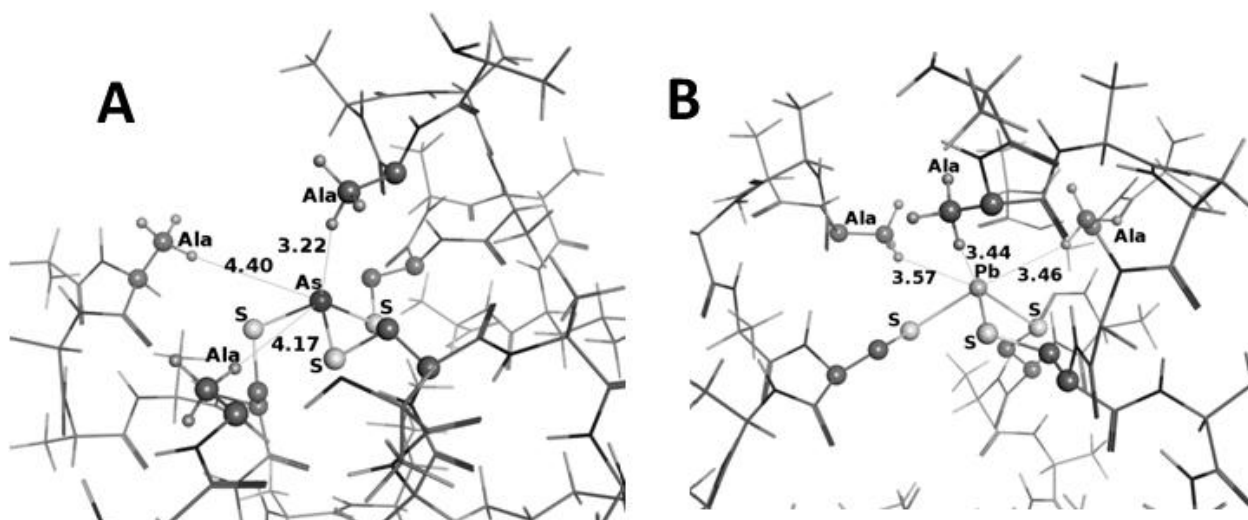

Figure S5. Closest H atom to M ion distances given in Angstrom. A)  $\text{As(III)(ACA)}_3$  and B)  $\text{Pb(II)(ACA)}_3$ .
